# Supplementary material for: Asymmetric aldol reaction catalyzed by amino acid tetrapeptides (l-Pro-l-Pro-l-Phe-l-Phe-OMe)
Source: Royal Society of Chemistry journal article supplement (doi:10.1039/d3re00119a), 2023-01-01

## Supporting information

### Asymmetric aldol reaction catalyzed by amino acid tetrapeptides (L-Pro-L-Pro-L-Phe-L-Phe-OMe)

Yaodong Wang,<sup>1</sup> Yudan Wang,<sup>1\*</sup> Lijia Liu,<sup>1,2\*</sup> Kexiao Sang,<sup>1</sup> Chunhong Zhang<sup>1,2\*</sup>, Toshifumi Satoh<sup>3</sup>

<sup>1</sup> Key Laboratory of Superlight Materials & Surface Technology, Ministry of Education, College of Materials Science and Chemical Engineering, Harbin Engineering University, Harbin, 150001, China;

<sup>2</sup> Yantai Research Institute of Harbin Engineering University, Yantai, 264006, China.

<sup>3</sup> Faculty of Engineering, Hokkaido University, Sapporo 060-8628, Japan

Corresponding authors: [yudanwang@hrbeu.edu.cn](mailto:yudanwang@hrbeu.edu.cn) (Y. Wang), [liulijia@hrbeu.edu.cn](mailto:liulijia@hrbeu.edu.cn) (L. Liu) and [zhangchunhong97@163.com](mailto:zhangchunhong97@163.com) (C. Zhang).

## Content

### S1 Experimental

**Table S1** Solubility test of L-Phe-L-Phe-OMe and L-Pro-L-Pro-L-Phe-L-Phe-OMe

**Table S2** Effects of solvent, time and catalyst dosage on asymmetric Aldol reaction

**Table S3** Effect of different catalysts on catalytic performance<sup>a</sup>

**Figure S1** Mechanism diagram of L-proline involved in hydroxyl aldehyde condensation reaction.

**Figure S2** XRD spectra of L-Pro-L-Pro-L-Phe-L-Phe-OMe (cycle 5).

**Table S4** Effect of temperature and catalyst dosage on reaction time.<sup>a</sup>

**Table S5** Some comparison data between proline catalyst and the peptide catalyst.

### S2 High performance liquid chromatography of the product

## **S1 Experimental**

### **S1.1 Chemicals and agents.**

Unless otherwise stated, all reagents were purchased from commercial sources and used without purification. Boc-L-phenylalanine, methyl-3-phenyl-L-alaninate, isobutyl chloroformate, 4-methylmorpholine, N,N'-dicyclohexylcarbodiimide, cyclohexanone, 4'-methylacetophenone, 4'-(trifluoromethoxy)-acetophenone,  $\alpha$ -tetralone, 1-acetonaphthone, acetophenone, 1-cyclohexylethan-1-one, 2-cyclohexen-1-one, 4-fluoroacetophenone, 4-methoxyacetophenone, 2-acetonaphthone were purchased from Sahn Chemical Technology Co., Ltd. Boc-L-Proline dipeptide, 4-phenyl-2-butanone, p-tolualdehyde, 4-bromo-2-hydroxybenzaldehyde, 2-imidazolecarboxaldehyde, vanillin, 4-bromobenzaldehyde, benzaldehyde were purchased from Aladdin Chemical Co., Ltd. (Shanghai, China). All solvents used in the reactions were of analytical grade, carefully dried, and distilled before use.

### **S 1.2 Characterization**

The  $^1\text{H}$  NMR spectra (500 MHz) were recorded using a Bruker AVANCE III-500 instrument at room temperature. IR spectra were obtained with a Perkin-Elmer FTIR-100 spectrophotometer. The characteristics were recorded using scanning electron microscope (Thermoscientific ApreoS LoVac, USA, SEM). The crystal structure of the catalyst was analyzed by X - ray diffraction (Rigaku Corporation, TTRIII, Japan, XRD). The absolute configuration of products was determined by JASCO PU-2089 high performance liquid chromatograph (HPLC) system equipped with UV-vis (JASCO-UV-2070), circular dichroism (JASCO-CD-2095) detectors and a column of AD-H using a solution of hexane/2-propanol as eluent at a flow rate of  $1\text{ mL min}^{-1}$ . A solution of product ( $1.00\text{ mg mL}^{-1}$ ) was injected into the chromatographic system through an intelligent sampler (JASCO AS-2055)

**Table S1** Solubility test of L-Phe-L-Phe-OMe and L-Pro-L-Pro-L-Phe-L-Phe-OMe

| solvent                         | L-Phe-L-Phe-OMe | L-Pro-L-Pro-L-Phe-L-Phe-OMe |
|---------------------------------|-----------------|-----------------------------|
| petroleum ether                 | —               | —                           |
| CCl <sub>4</sub>                | —               | —                           |
| CH <sub>2</sub> Cl <sub>2</sub> | —               | —                           |
| THF                             | —               | —                           |
| isopropanol                     | —               | —                           |
| CHCl <sub>3</sub>               | —               | —                           |
| pyridine                        | +               | —                           |
| triethylamine                   | —               | —                           |
| acetone                         | —               | —                           |
| DMF                             | —               | —                           |
| MeOH                            | —               | —                           |
| DMSO                            | +               | +                           |
| Hexafluoroisopropanol           | ++              | ++                          |
| H <sub>2</sub> O                | —               | —                           |

Notice: ++ dissolve, + slight soluble, - insoluble

**Table S2** Effects of solvent, time and catalyst dosage on asymmetric Aldol reaction <sup>a</sup>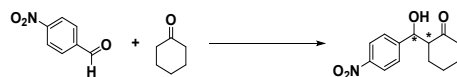

| Entry | Catalyst (mg) | Time (d) | solvent                         | Yield (%) <sup>b</sup> | ee (%) <sup>c</sup> | syn/anti <sup>c</sup> |
|-------|---------------|----------|---------------------------------|------------------------|---------------------|-----------------------|
| 1     | 2             | 7        | MeOH                            | 88                     | 4 (2R, 1'R)         | 56/44                 |
| 2     | 4             | 7        | MeOH                            | 90                     | 6 (2R, 1'R)         | 75/25                 |
| 3     | 6             | 7        | MeOH                            | 91                     | 9 (2R, 1'R)         | 89/11                 |
| 4     | 8             | 7        | MeOH                            | 92                     | 11 (2R, 1'R)        | 99/1                  |
| 5     | 10            | 7        | MeOH                            | 94                     | 13 (2R, 1'R)        | 99/1                  |
| 6     | 12            | 7        | MeOH                            | 95                     | 98 (2R, 1'R)        | 99/1                  |
| 7     | 14            | 7        | MeOH                            | 95                     | 98 (2R, 1'R)        | 99/1                  |
| 8     | 12            | 1        | MeOH                            | -                      | -                   | -                     |
| 9     | 12            | 2        | MeOH                            | -                      | -                   | -                     |
| 10    | 12            | 3        | MeOH                            | -                      | -                   | -                     |
| 11    | 12            | 4        | MeOH                            | 20                     | 95 (2R, 1'R)        | 98/1                  |
| 12    | 12            | 5        | MeOH                            | 24                     | 96 (2R, 1'R)        | 99/1                  |
| 13    | 12            | 6        | MeOH                            | 54                     | 95 (2R, 1'R)        | 99/1                  |
| 14    | 12            | 7        | MeOH                            | 95                     | 99 (2R, 1'R)        | 99/1                  |
| 15    | 12            | 8        | MeOH                            | 95                     | 99 (2R, 1'R)        | 99/1                  |
| 16    | 12            | 7        | MeOH                            | 95                     | 99 (2R, 1'R)        | 99/1                  |
| 17    | 12            | 7        | THF                             | 91                     | 99 (2R, 1'R)        | 99/1                  |
| 18    | 12            | 7        | CH <sub>2</sub> Cl <sub>2</sub> | 92                     | 99 (2R, 1'R)        | 99/1                  |
| 19    | 12            | 7        | CHCl <sub>3</sub>               | 92                     | 99 (2R, 1'R)        | 99/1                  |
| 20    | 12            | 7        | toluene                         | 45                     | 99 (2R, 1'R)        | 99/1                  |

<sup>a</sup>The reaction was performed with cyclohexanone (0.6 mmol), paranitroanisole (0.5 mmol), L-Pro-L-Pro-L-Phe-L-Phe-OMe at 25 °C. <sup>b</sup> Isolated yields. <sup>c</sup> For R enantiomer, determined by chiral HPLC analysis (Chiralpak AD-H) with hexane/isopropanol (90/10, v/v) as the eluent.

**Table S3** Effect of different catalysts on catalytic performance <sup>a</sup>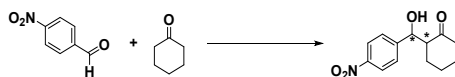

| Entry | Catalyst                                         | Yield (%) <sup>b</sup> | ee (%) <sup>c</sup> | syn/anti <sup>c</sup> |
|-------|--------------------------------------------------|------------------------|---------------------|-----------------------|
| 1     | L-Pro-L-Pro-L-Phe-L-Phe-OMe (12.0 mg, 4.6 mmol%) | 95                     | 99 (2R, 1'R)        | 99/1                  |
| 2     | L-Pro-L-Phe-L-Phe-OMe (9.7 mg, 4.6 mmol%)        | 90                     | 89 (2R, 1'R)        | 99/1                  |
| 3     | L-Phe-L-Phe-OMe (7.5 mg, 4.6 mmol%)              | 12                     | 26(2R, 1'R)         | 75/25                 |
| 4     | L-Pro-L-Pro (4.8 mg, 4.6 mmol%)                  | 91                     | 88(2R, 1'R)         | 90/10                 |
| 5     | L-Phe (3.8 mg, 4.6 mmol%)                        | 10                     | 13 (2R, 1'R)        | 62/38                 |
| 6     | L-Phe-OMe (4.1 mg, 4.6 mmol%)                    | 9                      | 16 (2R, 1'R)        | 60/40                 |

<sup>a</sup>The reaction was performed with cyclohexanone (0.6 mmol), paranitroanisole (0.5 mmol), and MeOH (1mL) at 25 °C 7d. <sup>b</sup> Isolated yields. <sup>c</sup> For R enantiomer, determined by chiral HPLC analysis (Chiralpak AD-H) with hexane/isopropanol (90/10, v/v) as the eluent.

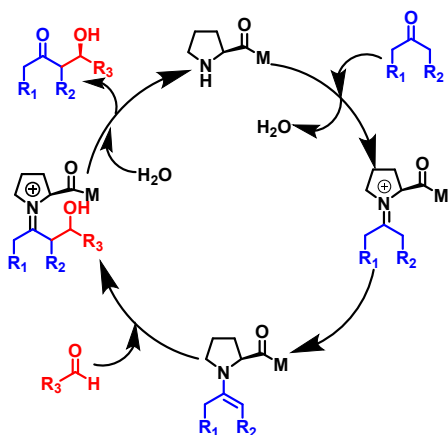**Figure S1** Mechanism diagram of L-proline involved in hydroxyl aldehyde condensation reaction.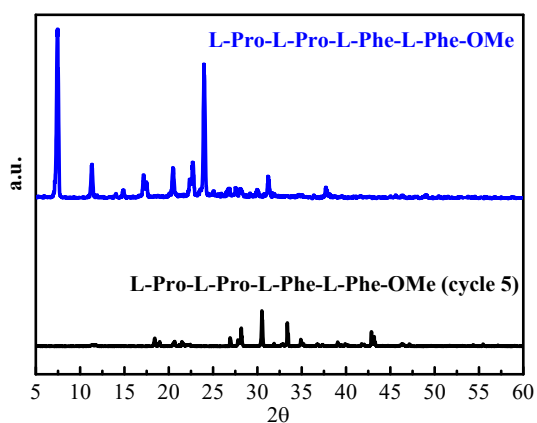**Figure S2** XRD spectra of L-Pro-L-Pro-L-Phe-L-Phe-OMe (cycle 5).

**Table S4** Effect of temperature and catalyst dosage on reaction time.<sup>a</sup>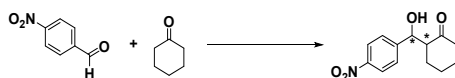

| Entry | Catalyst                              | Temperature (°C) | Time (d) | Yield (%) <sup>b</sup> | ee (%) <sup>c</sup> | syn/anti <sup>c</sup> |
|-------|---------------------------------------|------------------|----------|------------------------|---------------------|-----------------------|
| 1     | L-Pro-L-Pro-L-Phe-L-Phe-OMe (12.0 mg) | 25               | 7        | 95                     | 99 (2R, 1'R)        | 99/1                  |
| 2     | L-Pro-L-Pro-L-Phe-L-Phe-OMe (16.0 mg) | 25               | 6.5      | 95                     | 99 (2R, 1'R)        | 99/1                  |
| 3     | L-Pro-L-Pro-L-Phe-L-Phe-OMe (20.0 mg) | 25               | 6        | 95                     | 98 (2R, 1'R)        | 99/1                  |
| 4     | L-Pro-L-Pro-L-Phe-L-Phe-OMe (24.0 mg) | 25               | 6        | 95                     | 99 (2R, 1'R)        | 99/1                  |
| 5     | L-Pro-L-Pro-L-Phe-L-Phe-OMe (20.0 mg) | 30               | 6        | 95                     | 99 (2R, 1'R)        | 99/1                  |
| 6     | L-Pro-L-Pro-L-Phe-L-Phe-OMe (20.0 mg) | 35               | 5.5      | 95                     | 98 (2R, 1'R)        | 99/1                  |
| 7     | L-Pro-L-Pro-L-Phe-L-Phe-OMe (20.0 mg) | 40               | 5        | 95                     | 92 (2R, 1'R)        | 97/3                  |
| 8     | L-Pro-L-Pro-L-Phe-L-Phe-OMe (20.0 mg) | 45               | 5        | 95                     | 85 (2R, 1'R)        | 96/4                  |

<sup>a</sup> The reaction was performed with cyclohexanone (0.6 mmol), paranitroanisole (0.5 mmol), and MeOH (1mL). <sup>b</sup> Isolated yields. <sup>c</sup> For R enantiomer, determined by chiral HPLC analysis (Chiralpak AD-H) with hexane/isopropanol (90/10, v/v) as the eluent.

**Table S5** Some comparison data between proline catalyst and the peptide catalyst.

| references                                                                                                                                                                                                        | Catalyst            | reported ee and yield     | this experiment           |
|-------------------------------------------------------------------------------------------------------------------------------------------------------------------------------------------------------------------|---------------------|---------------------------|---------------------------|
| [47] Asymmetric catalysis with short-chain peptides                                                                                                                                                               | Polypeptide         | ee 90-97%<br>yield 82-90% | ee 95-99%<br>yield 91-95% |
| [31] Recent efforts directed to the development of more sustainable asymmetric organocatalysis                                                                                                                    | Proline derivatives | ee 68-96%<br>yield 60-90% |                           |
| [40] Improving the Catalytic Performance of (S)-Proline as Organocatalyst in Asymmetric Aldol Reactions in the Presence of Solvate Ionic Liquids: Involvement of a Supramolecular Aggregate                       | Proline derivatives | ee 92-94%<br>yield 62-92% |                           |
| [46] Organocatalytic activity of $\alpha,\alpha$ -dipeptide derivatives of (S)-proline in the asymmetric aldol reaction in absence of solvent. Evidence for non-covalent p-p interactions in the transition state | Polypeptide         | ee 94-98%<br>yield 79-89% |                           |

## S2 High performance liquid chromatography of the product

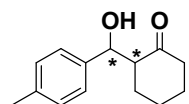

**Table 1, 3a (2R, 1'S).** The product is yellow liquid. L-Pro-L-Pro-L-Phe-L-Phe-OMe is the catalyst. Reaction time 10 min, enantiomeric excess: 99%; Chiral HPLC analysis: Daicel

Chiralpak AD-H, hexane/iso-propanol =90/10, flow rate = 1.0 mL/min,  $\lambda = 254$  nm, retention time:  $tR_1$  (major) =5.050 min,  $tR_2$  =5.458 min,  $tR_3$  =6.095 min,  $tR_4$  =6.870 min.  $^1H$  NMR (500 MHz,  $CDCl_3$ ,  $\delta$ ): 1.68-1.99 (m, 6H,  $CH_2$ ), 2.19 (s, 3H,  $CH_3$ ), 2.33 (m, 2H,  $CH_2$ ), 2.63 (m, 1H, CH), 5.01 (m, 1H, CH), 5.14 (s, 1H, OH), 7.10 (m, 2H, Ar-H), 7.23 (m, 2H, Ar-H).

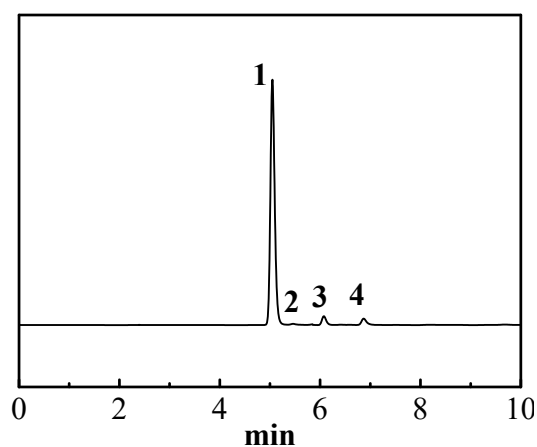

|   | time/min | area%  |
|---|----------|--------|
| 1 | 5.050    | 93.711 |
| 2 | 5.458    | 0.298  |
| 3 | 6.095    | 3.316  |
| 4 | 6.870    | 2.624  |

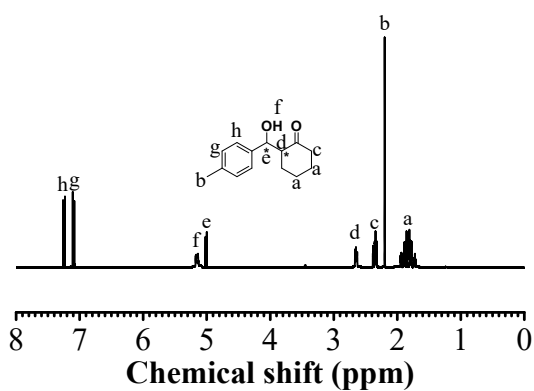

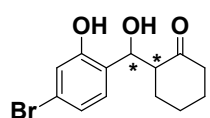

**Table 1, 3b (2R, 1'S).** The product is yellow liquid. L-Pro-L-Pro-L-Phe-L-Phe-OMe is the catalyst. Reaction time 15 min, enantiomeric excess: 87%; Chiral HPLC analysis: Daicel

Chiralpak AD-H, hexane/iso-propanol =90/10, flow rate = 1.0 mL/min,  $\lambda = 254$  nm, retention time:  $tR_1$  (major) =6.500 min,  $tR_2$  =9.842 min,  $tR_3$  = 12.174 min,  $tR_4$  = 12.610 min.  $^1H$  NMR (500 MHz,  $CDCl_3$ ,  $\delta$ ): 1.64-2.00 (m, 6H,  $CH_2$ ), 2.31 (m, 2H,  $CH_2$ ), 2.65 (m, 1H, CH), 4.99 (s, 1H, CH), 7.04 (s, 1H, OH), 7.07 (m, 1H, Ar-H), 7.18 (s, 1H, Ar-H), 7.41 (m, 1H, Ar-H), 9.69 (s, 1H, OH).

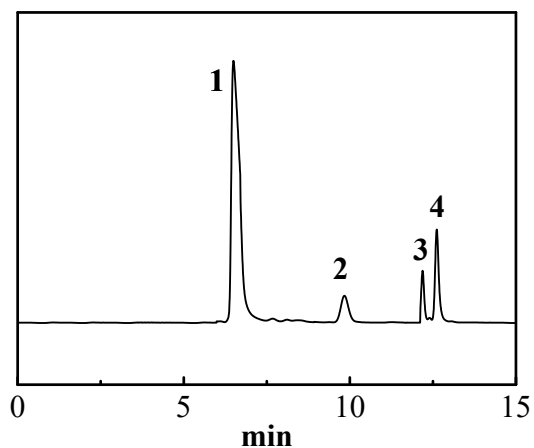

|   | time/min | area%  |
|---|----------|--------|
| 1 | 6.500    | 80.661 |
| 2 | 9.842    | 5.772  |
| 3 | 12.174   | 3.991  |
| 4 | 12.610   | 9.576  |

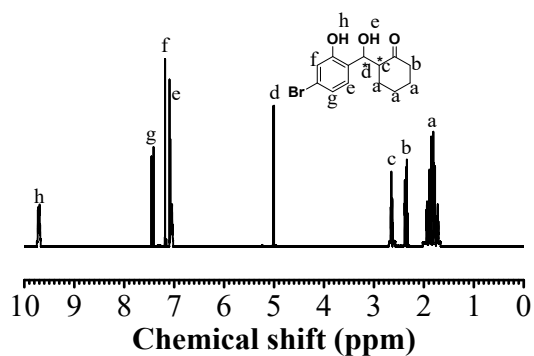



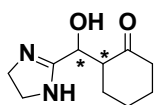

**Table 1, 3c (2R, 1'S).** The product is yellow liquid. L-Pro-L-Pro-L-Phe-L-Phe-OMe is the catalyst.

Reaction time 20 min, enantiomeric excess: 99%; Chiral HPLC analysis: Daicel Chiralpak AD-H,

hexane/iso-propanol =90/10, flow rate = 1.0 mL/min,  $\lambda = 254$  nm, retention time:  $tR_1$  (major) = 8.217 min.  $^1H$

NMR (500 MHz,  $CDCl_3$ ,  $\delta$ ): 1.49 (s, 1H, NH), 1.65-1.97 (m, 6H,  $CH_2$ ), 2.33 (m, 2H,  $CH_2$ ), 3.44 (m, 2H,  $CH_2$ ),

3.81 (s, 3H,  $CH_2$ , CH), 7.49 (s, 1H, OH).

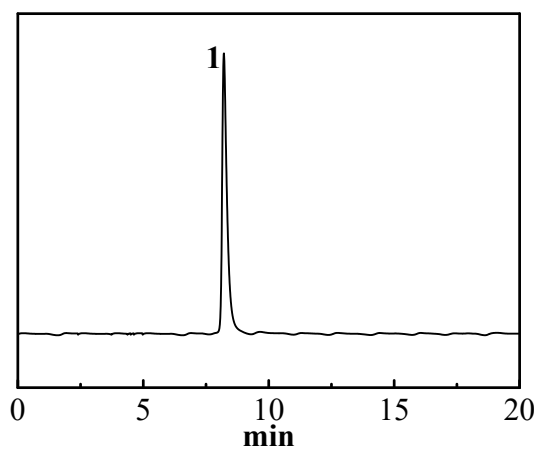

|   | time/min | area% |
|---|----------|-------|
| 1 | 8.217    | >99   |

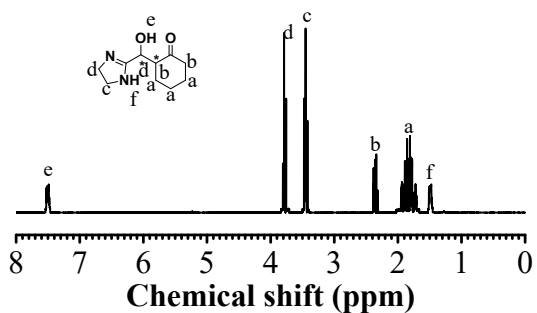

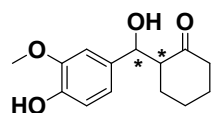

**Table 1, 3d (2R, 1'S).** The product is yellow liquid. L-Pro-L-Pro-L-Phe-L-Phe-OMe aicel

Chiralpak AD-H, hexane/iso-propanol =90/10, flow rate = 1.0 mL/min,  $\lambda = 254$  nm, retention

time:  $tR_1$  (major) = 7.458 min,  $tR_2 = 8.017$  min,  $tR_3 = 19.809$  min,  $tR_4 = 23.189$  min.  $^1H$  NMR (500 MHz,  $CDCl_3$ ,

$\delta$ ): 1.70-1.97 (m, 6H,  $CH_2$ ), 2.38 (m, 2H,  $CH_2$ ), 2.65 (m, 1H, CH), 3.78 (s, 3H,  $CH_3$ ), 4.98 (s, 1H, CH), 5.17 (s,

1H, OH), 6.82 (m, 3H, Ar-H), 10.02 (s, 1H, OH).

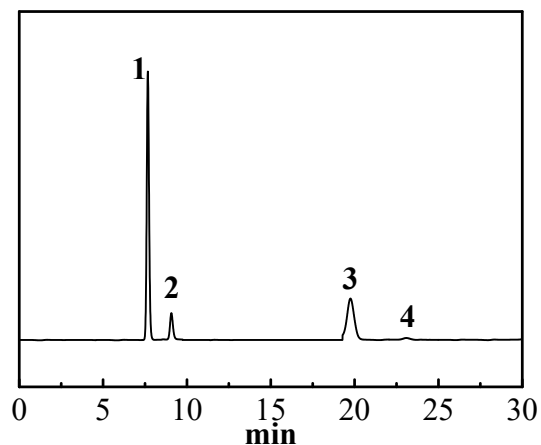

|   | time/min | area%  |
|---|----------|--------|
| 1 | 7.458    | 68.562 |
| 2 | 8.017    | 8.017  |
| 3 | 19.809   | 11.787 |
| 4 | 23.189   | 0.819  |

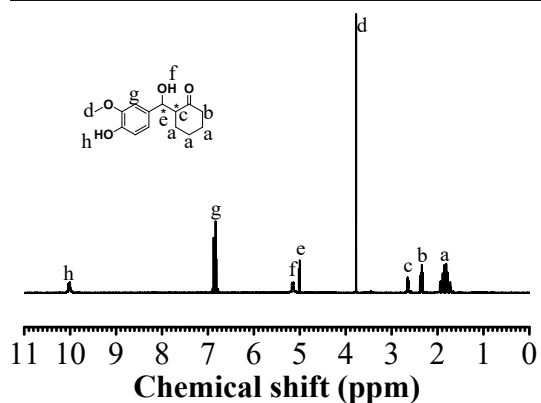

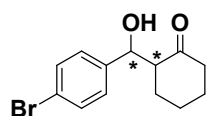

**Table 1, 3e (2R, 1'S).** The product is yellow liquid. L-Pro-L-Pro-L-Phe-L-Phe-OMe is the catalyst. Reaction time 10 min, enantiomeric excess: 95%; Chiral HPLC analysis: Daicel

Chiralpak AD-H, hexane/iso-propanol =90/10, flow rate = 1.0 mL/min,  $\lambda = 254$  nm, retention

time:  $t_{R1}$  (major) = 5.917 min,  $t_{R2}$  = 6.603 min,  $t_{R3}$  = 8.298 min,  $t_{R4}$  = 9.108 min.  $^1\text{H}$  NMR (500 MHz,  $\text{CDCl}_3$ ,

$\delta$ ): 1.62-1.82 (m, 6H,  $\text{CH}_2$ ), 2.33 (m, 2H,  $\text{CH}_2$ ), 2.65 (m, 1H, CH), 4.99 (s, 1H, CH), 5.13 (s, 1H, OH), 7.14 (m,

2H, Ar-H), 7.79 (m, 2H, Ar-H).

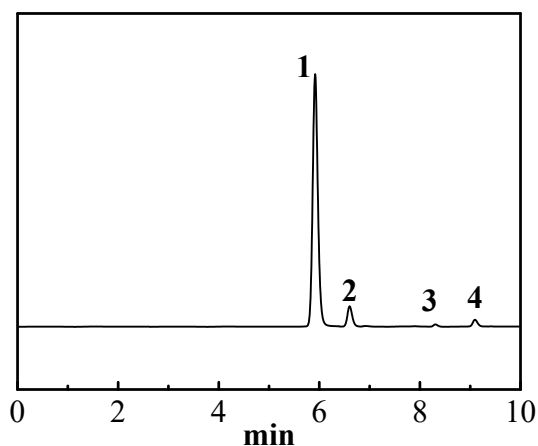

|   | time/min | area%  |
|---|----------|--------|
| 1 | 5.917    | 96.460 |
| 2 | 6.603    | 2.366  |
| 3 | 8.298    | 0.120  |
| 4 | 9.108    | 1.054  |

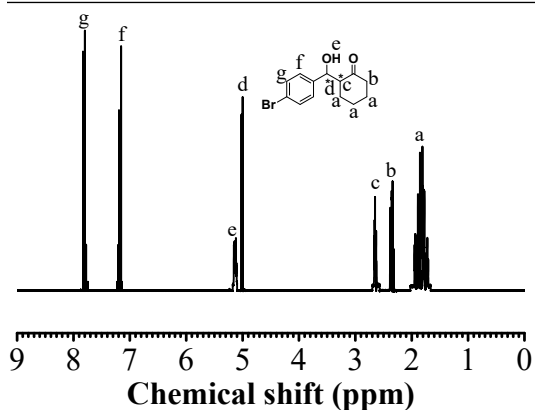

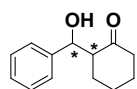

**Table 1, 3f (2R, 1'S).** The product is yellow liquid. L-Pro-L-Pro-L-Phe-L-Phe-OMe is the catalyst.

Reaction time 10 min, enantiomeric excess: 99%; Chiral HPLC analysis: Daicel Chiralpak AD-H, hexane/iso-propanol =90/10, flow rate = 1.0 mL/min,  $\lambda = 254$  nm, retention time:  $tR_1$  (major) = 5.033 min,  $tR_2 = 5.992$  min,  $tR_3 = 7.244$  min,  $tR_4 = 8.081$  min.  $^1H$  NMR (500 MHz,  $CDCl_3$ ,  $\delta$ ): 1.69-1.95 (m, 6H,  $CH_2$ ), 2.33 (m, 2H,  $CH_2$ ), 2.66 (m, 1H, CH), 5.00 (s, 1H, CH), 5.12 (s, 1H, OH), 7.20-7.39 (m, 5H, Ar-H).

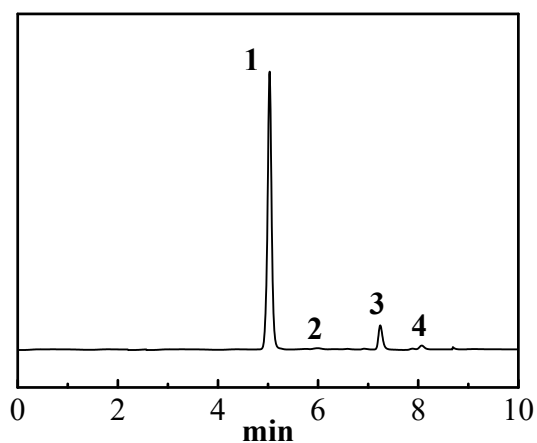

|   | time/min | area%  |
|---|----------|--------|
| 1 | 5.033    | 9.0667 |
| 2 | 5.992    | 0.755  |
| 3 | 7.244    | 7.940  |
| 4 | 8.081    | 1.258  |

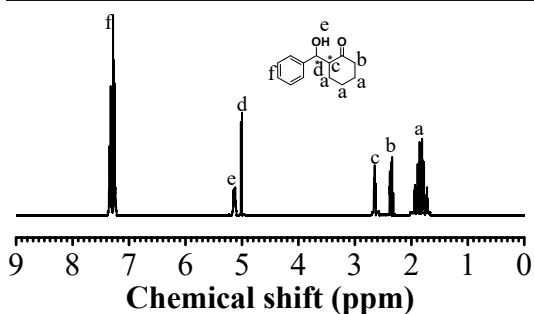

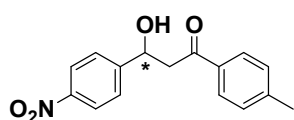

**Table 2, 6a (R).** The product is yellow liquid. L-Pro-L-Pro-L-Phe-L-Phe-OMe is the catalyst. Reaction time 20 min, enantiomeric excess: 97%; Chiral HPLC analysis: Daicel

Chiralpak AD-H, hexane/iso-propanol =90/10, flow rate = 1.0 mL/min,  $\lambda = 254$  nm, retention time:  $tR_1$  (major) = 4.625 min,  $tR_2 = 5.425$  min.  $^1H$  NMR (500 MHz,  $CDCl_3$ ,  $\delta$ ): 2.41 (m, 3H,  $CH_3$ ), 2.89 and 3.16 (m, 2H,  $CH_2$ ), 5.14 (s, 1H, OH), 5.41 (m, 1H, CH), 6.75 (m, 2H, Ar-H), 7.40 (m, 2H, Ar-H), 7.65 (m, 2H, Ar-H), 8.17 (m, 2H, Ar-H).

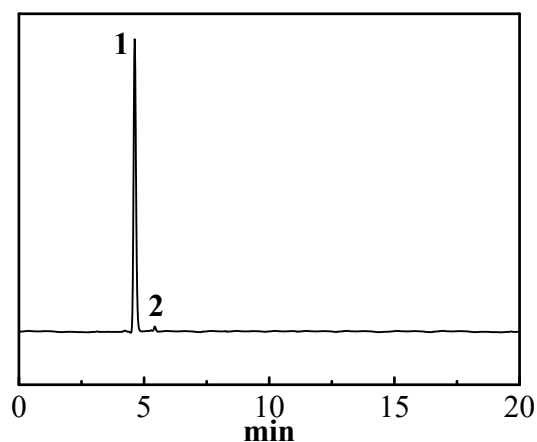

|   | time/min | area%  |
|---|----------|--------|
| 1 | 4.625    | 98.961 |
| 2 | 5.425    | 1.039  |

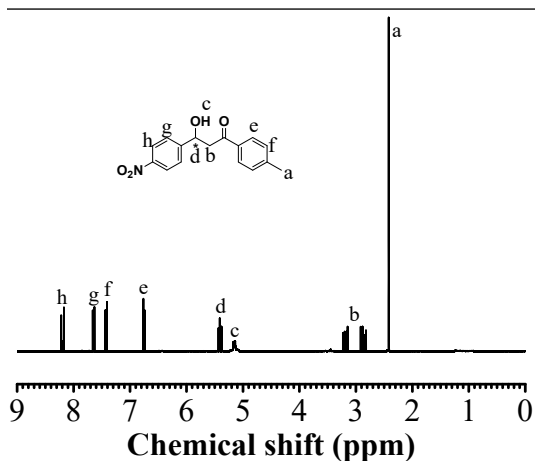

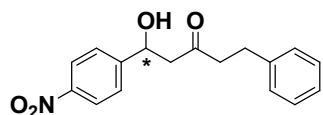

**Table 2, 6b (R).** The product is yellow liquid. L-Pro-L-Pro-L-Phe-L-Phe-OMe is the catalyst. Reaction time 20 min, enantiomeric excess: 99%; Chiral HPLC analysis:

Daicel Chiralpak AD-H, hexane/iso-propanol =90/10, flow rate = 1.0 mL/min,  $\lambda = 254$  nm, retention time:  $t_{R1}$  (major) = 20.537 min,  $t_{R2} = 22.788$  min.  $^1\text{H NMR}$  (500 MHz,  $\text{CDCl}_3$ ,  $\delta$ ): 2.78-3.25 (m, 6H,  $\text{CH}_2$ ), 5.09 (m, 2H, CH, OH), 7.12-7.30 (m, 5H, Ar-H), 7.63 (m, 2H, Ar-H), 8.16 (m, 2H, Ar-H)

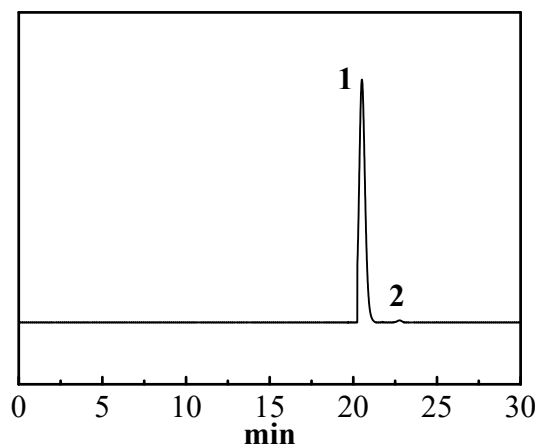

|   | time/min | area%  |
|---|----------|--------|
| 1 | 20.537   | 99.978 |
| 2 | 22.788   | 0.022  |

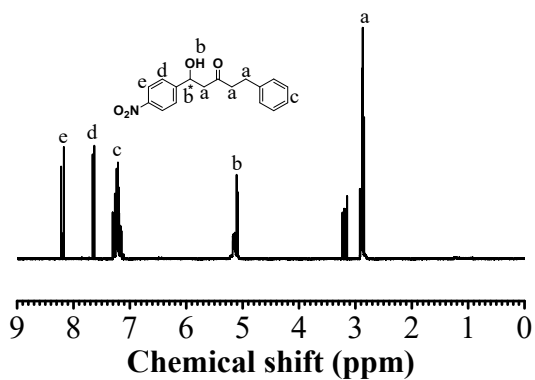

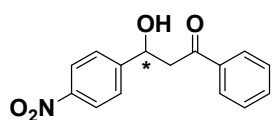

**Table 2, 6c (R).** The product is yellow liquid. L-Pro-L-Pro-L-Phe-L-Phe-OMe is the catalyst. Reaction time 30 min, enantiomeric excess: 99%; Chiral HPLC analysis: Daicel

Chiralpak AD-H, hexane/iso-propanol =90/10, flow rate = 1.0 mL/min,  $\lambda = 254$  nm,

retention time:  $tR_1$  (major) = 20.400 min.  $^1\text{H NMR}$  (500 MHz,  $\text{CDCl}_3$ ,  $\delta$ ): 2.87 and 3.14 (m, 2H,  $\text{CH}_2$ ), 5.11 (s, 1H, OH), 5.42 (m, 1H, CH), 7.42-7.63 (m, 5H, Ar-H), 7.98 (m, 2H, Ar-H), 8.16 (m, 2H, Ar-H).

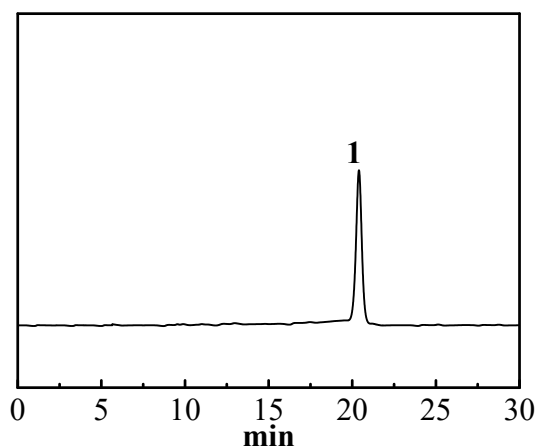

|   | time/min | area% |
|---|----------|-------|
| 1 | 20.400   | >99   |

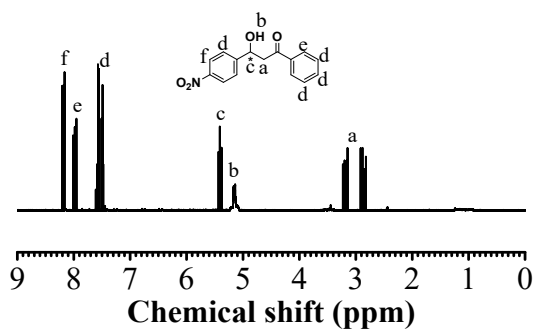

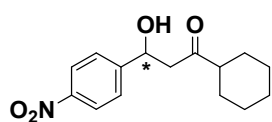

**Table 2, 6d (R).** The product is yellow liquid. L-Pro-L-Pro-L-Phe-L-Phe-OMe is the catalyst. Reaction time 30 min, enantiomeric excess: 99%; Chiral HPLC analysis: Daicel

Chiralpak AD-H, hexane/iso-propanol =90/10, flow rate = 1.0 mL/min,  $\lambda = 254$  nm,

retention time:  $t_{R1}$  (major) = 20.211 min,  $t_{R2}$  = 25.403 min.  $^1\text{H NMR}$  (500 MHz,  $\text{CDCl}_3$ ,  $\delta$ ): 1.33-1.82 (m, 10H,  $\text{CH}_2$ ), 2.29 (m, 1H, CH), 2.89 and 3.16 (m, 2H,  $\text{CH}_2$ ), 5.10 (m, 2H, CH, OH), 7.62 (m, 2H, Ar-H), 8.17 (m, 2H, Ar-H).

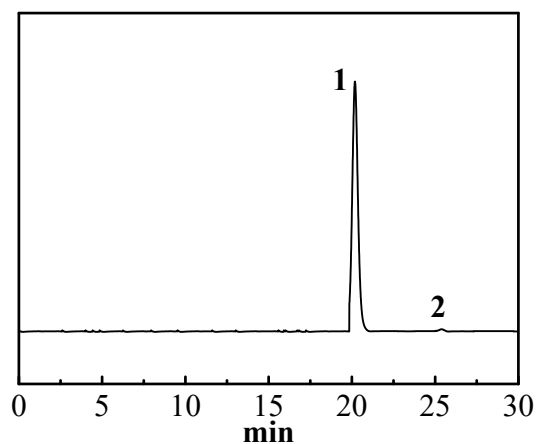

|   | time/min | area%  |
|---|----------|--------|
| 1 | 20.211   | 99.971 |
| 2 | 25.403   | 0.029  |

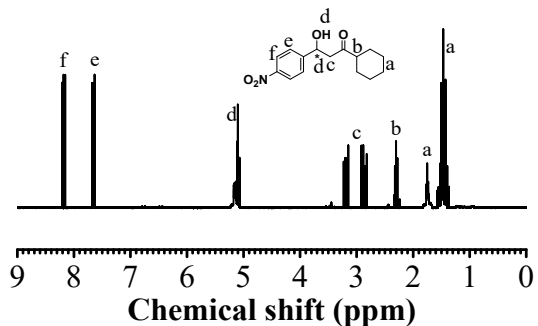



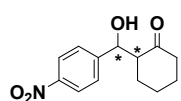

**Table 2, 6e (2R, 1'S).** The product is yellow liquid. L-Pro-L-Pro-L-Phe-L-Phe-OMe is the catalyst. Reaction time 40 min, enantiomeric excess: 99%; Chiral HPLC analysis: Daicel Chiralpak AD-H, hexane/iso-propanol =90/10, flow rate = 1.0 mL/min,  $\lambda = 254$  nm, retention time:  $tR_1$  (major) = 20.702 min,  $tR_2 = 23.800$  min,  $tR_3 = 26.433$  min,  $tR_4 = 35.133$  min.  $^1H$  NMR (500 MHz,  $CDCl_3$ ,  $\delta$ ): 1.67-1.98 (m, 6H,  $CH_2$ ), 2.33 (m, 2H,  $CH_2$ ), 2.66 (m, 1H, CH), 5.02 (s, 1H, CH), 5.17 (s, 1H, OH), 7.61 (m, 2H, Ar-H), 8.17 (m, 2H, Ar-H).

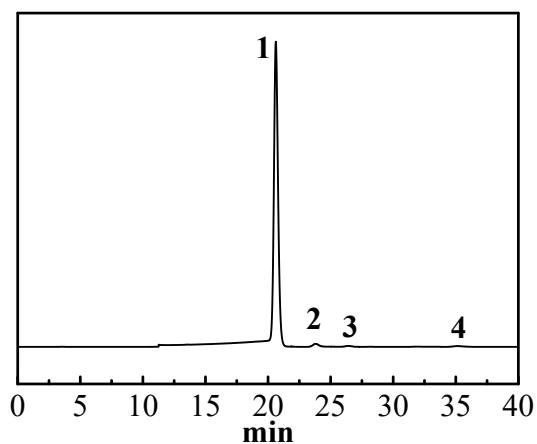

|   | time/min | area%  |
|---|----------|--------|
| 1 | 20.702   | 98.541 |
| 2 | 23.800   | 1.146  |
| 3 | 26.433   | 0.188  |
| 4 | 35.133   | 0.124  |

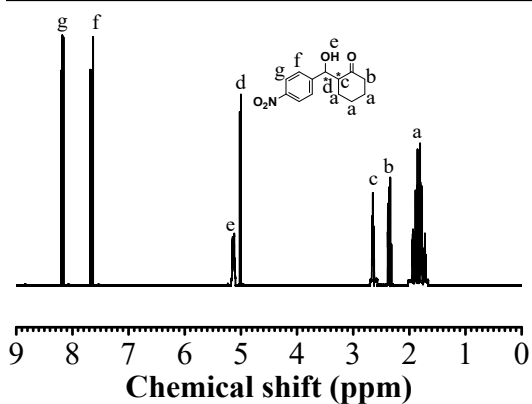

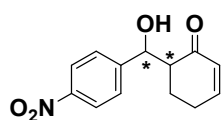

**Table 2, 6f (2R, 1'S).** The product is yellow liquid. L-Pro-L-Pro-L-Phe-L-Phe-OMe is the catalyst. Reaction time 30 min, enantiomeric excess: 99%; Chiral HPLC analysis: Daicel

Chiralpak AD-H, hexane/iso-propanol =90/10, flow rate = 1.0 mL/min,  $\lambda = 254$  nm, retention

time:  $tR_1$  (major) = 20.098 min,  $tR_2 = 23.189$  min.  $^1H$  NMR (500 MHz,  $CDCl_3$ ,  $\delta$ ): 1.22 and 1.49 (m, 2H,  $CH_2$ ), 1.93 (m, 2H,  $CH_2$ ), 2.61 (m, 1H, CH), 2.30 (m, 1H, CH), 5.01 (m, 1H, CH), 5.13 (m, 1H, OH), 6.07 (m, 1H, CH), 7.42 (m, 1H, CH), 7.63 (m, 2H, Ar-H), 8.16 (m, 2H, Ar-H).

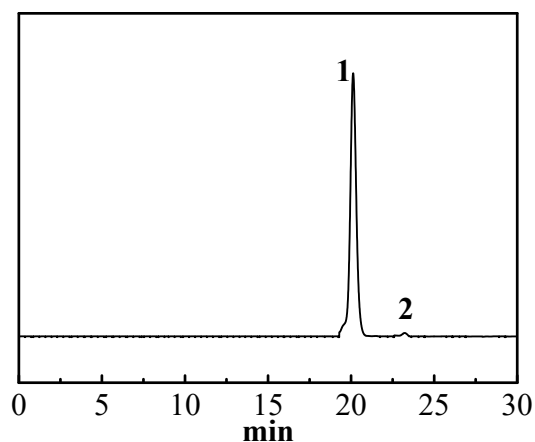

|   | time/min | area%  |
|---|----------|--------|
| 1 | 20.098   | 99.961 |
| 2 | 23.189   | 0.039  |

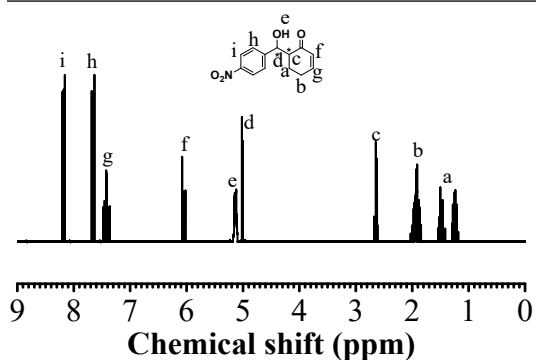

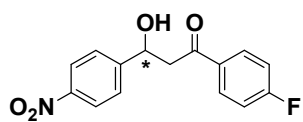

**Table 2, 6g (R).** The product is yellow liquid. L-Pro-L-Pro-L-Phe-L-Phe-OMe is the catalyst. Reaction time 30 min, enantiomeric excess: 99%; Chiral HPLC analysis:

Daicel Chiralpak AD-H, hexane/iso-propanol =90/10, flow rate = 1.0 mL/min,  $\lambda = 254$

nm, retention time:  $tR_1$  (major) = 19.150 min,  $tR_2 = 24.05$  min.  $^1H$  NMR (500 MHz,  $CDCl_3$ ,  $\delta$ ): 2.85 and 3.16 (m, 2H, CH<sub>2</sub>), 5.16 (s, 1H, OH), 5.42 (m, 1H, CH), 7.35 (m, 2H, Ar-H), 7.65 (m, 2H, Ar-H), 8.16 (m, 4H, Ar-H).

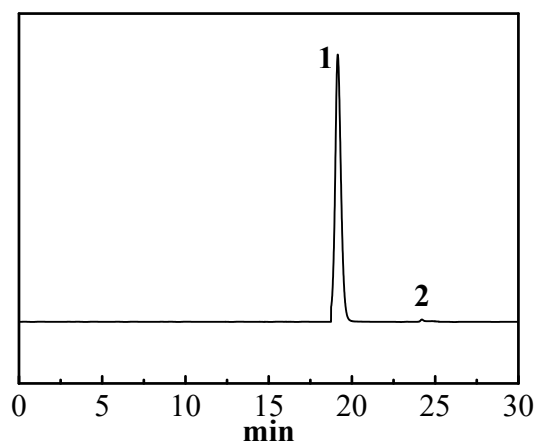

|   | time/min | area%  |
|---|----------|--------|
| 1 | 19.150   | 99.931 |
| 2 | 24.205   | 0.069  |

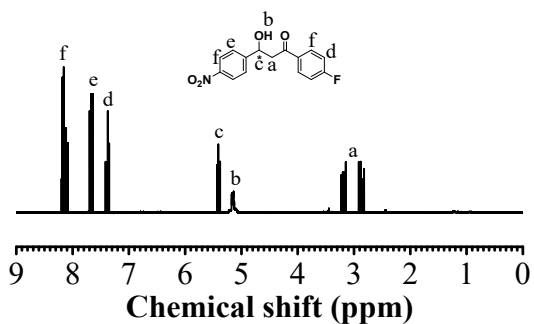

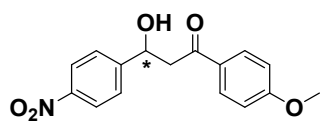

**Table 2, 6h (R).** The product is yellow liquid. L-Pro-L-Pro-L-Phe-L-Phe-OMe is the catalyst. Reaction time 30 min, enantiomeric excess: 99%; Chiral HPLC analysis: Daicel Chiralpak AD-H, hexane/iso-propanol =90/10, flow rate = 1.0 mL/min,  $\lambda = 254$

nm, retention time:  $tR_1$  (major) = 22.205 min,  $tR_2 = 25.660$  min.  $^1H$  NMR (500 MHz,  $CDCl_3$ ,  $\delta$ ): 2.84 and 3.19 (m, 2H,  $CH_2$ ), 3.80 (s, 3H,  $CH_3$ ), 5.12 (s, 1H, OH), 5.40 (m, 1H, CH), 7.07 (m, 2H, Ar-H), 7.64 (m, 2H, Ar-H),

7

95 (m, 2H, Ar-H), 8.19 (m, 2H, Ar-H).

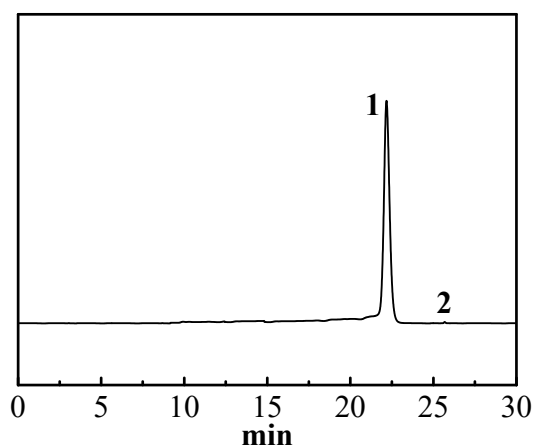

|   | time/min | area%  |
|---|----------|--------|
| 1 | 22.205   | 99.954 |
| 2 | 25.660   | 0.056  |

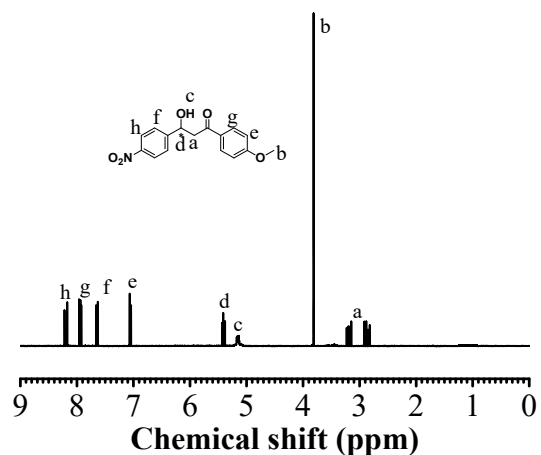

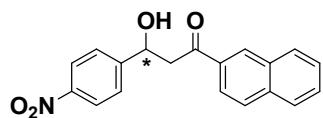

**Table 2, 6i (R).** The product is yellow liquid. L-Pro-L-Pro-L-Phe-L-Phe-OMe is the catalyst. Reaction time 30 min, enantiomeric excess: 87%; Chiral HPLC analysis:

Daicel Chiralpak AD-H, hexane/iso-propanol =90/10, flow rate = 1.0 mL/min,  $\lambda$  = 254

nm, retention time:  $t_{R1}$  (major) =17.414 min,  $t_{R2}$  =20.537 min. <sup>1</sup>H NMR (500 MHz, CDCl<sub>3</sub>,  $\delta$ ): 2.89 and 3.19 (m, 2H, CH<sub>2</sub>), 5.14 (s, 1H, OH), 5.40 (m, 1H, CH), 7.55-7.86 (m, 5H, Ar-H), 8.04 (m, 2H, Ar-H), 8.21 (m, 3H, Ar-H), 8.55 (s, 1H, Ar-H).

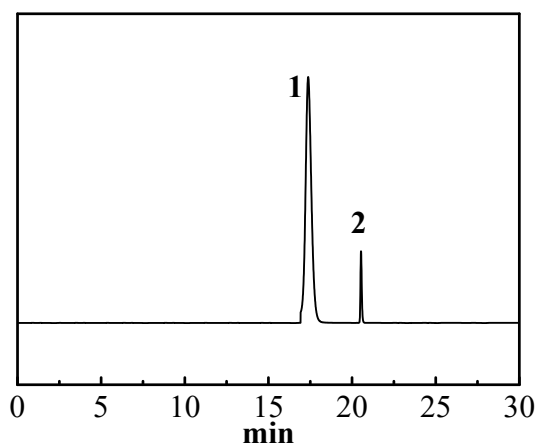

|   | time/min | area%  |
|---|----------|--------|
| 1 | 17.414   | 93.603 |
| 2 | 20.537   | 6.397  |

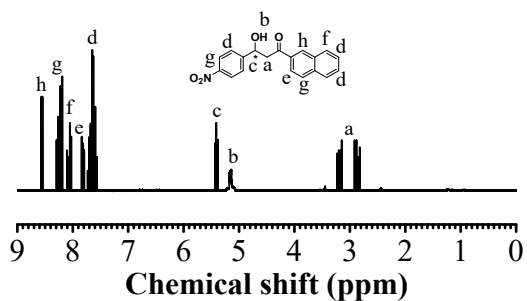

Supplement: d3re00119a1.pdf [file d3re00119a1.pdf]
